# Supplementary material for: Construction of Credit Evaluation Index System for Two-Stage Bayesian Discrimination: An Empirical Analysis of Small Chinese Enterprises
Source: Hindawi journal article supplement (doi:10.1155/2021/8837419), 2021-01-19
Supplement: f1 [file 8837419.f1.pdf]

## Supplementary Material

### Code:

#### 1. code for nonparametric Bayesian method:

```
proc discrim data=a method=npair kernel=normal r=0.5 crosslisterr;  
class y;( y- default status or default loss rate)  
priors proportional;  
var x1-x13;(x- indicator)  
run;
```

(The value of r should be adjusted continuously until the overall discrimination accuracy is the highest)

#### 2. Parameter Bayesian method code:

```
Proc discrim data=b crosslist;  
Class y; ( y- default status or default loss rate)  
Var x1-x9; (x- indicator)  
Run;
```

#### 3. Parameter clustering code:

```
proc cluster data=c method=ward;  
var z;(z- default loss rate)  
id xh;  
proc tree;  
run;
```

#### 4. Nonparametric clustering code:

```
proc modeclus data=c method=6 k=2 test list;  
var z; (z- default loss rate)  
run;
```

#### 5. Logistic regression code:

```
proc logistic descending data=d;  
model y = x1-x81 /selection = forward slentry = 0.05 details;  
run;  
(y- default status or default loss rate)  
(x- indicator)
```

According to the reviewer's comment, in order to verify the stability of the model, we randomly selected 80% of all samples as the training set and 20% of the samples as the test set, and carried out three simple cross-validation of the model. The verification results are as follows:

**The results of the first simple cross-validation are as follows:**

Nonparametric model results:

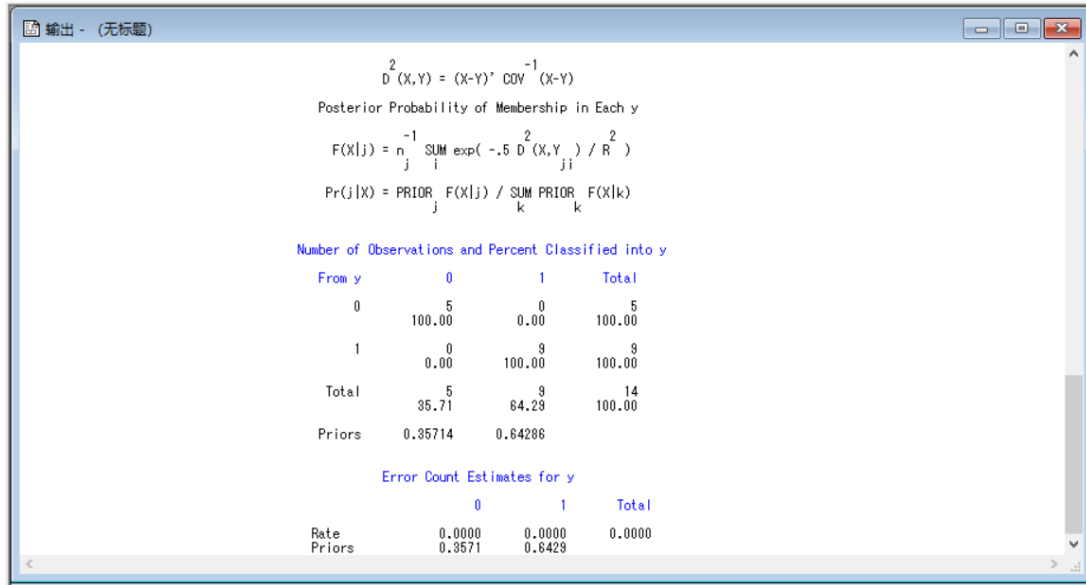

Parametric model results:

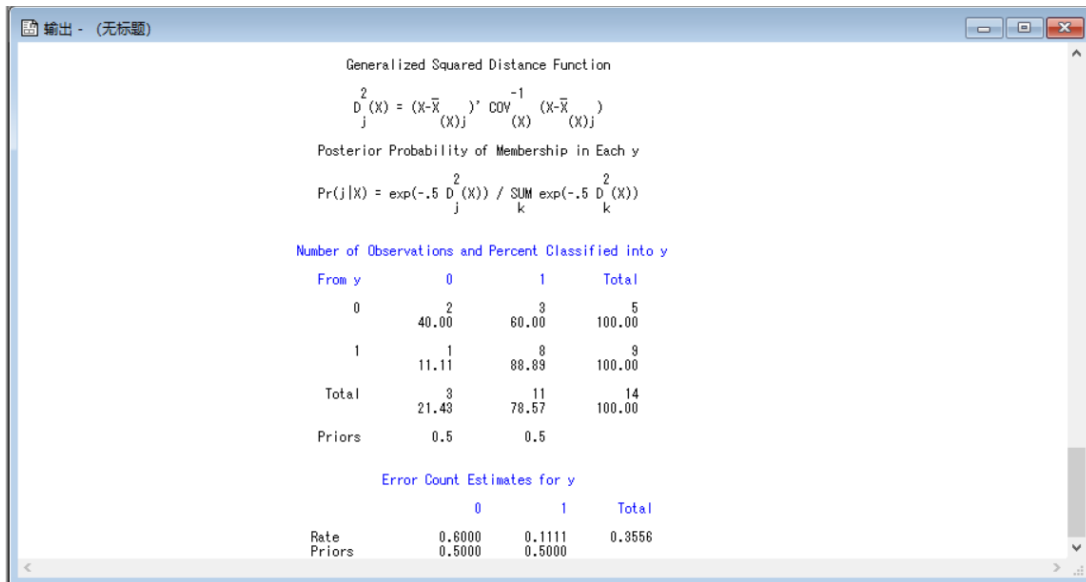

Logistic regression model results:

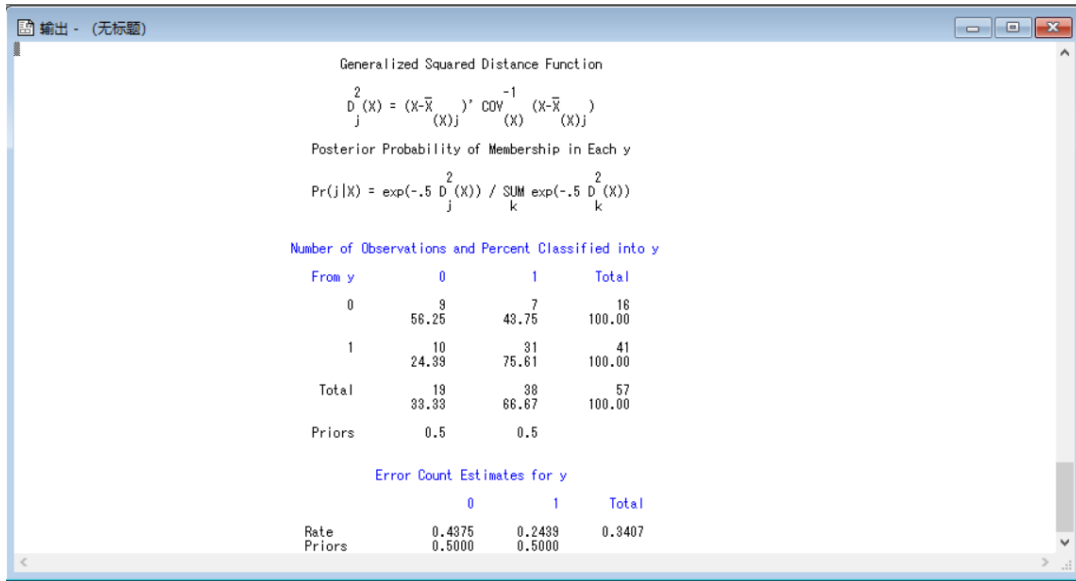

The results of the second simple cross-validation are as follows:

Nonparametric model results:

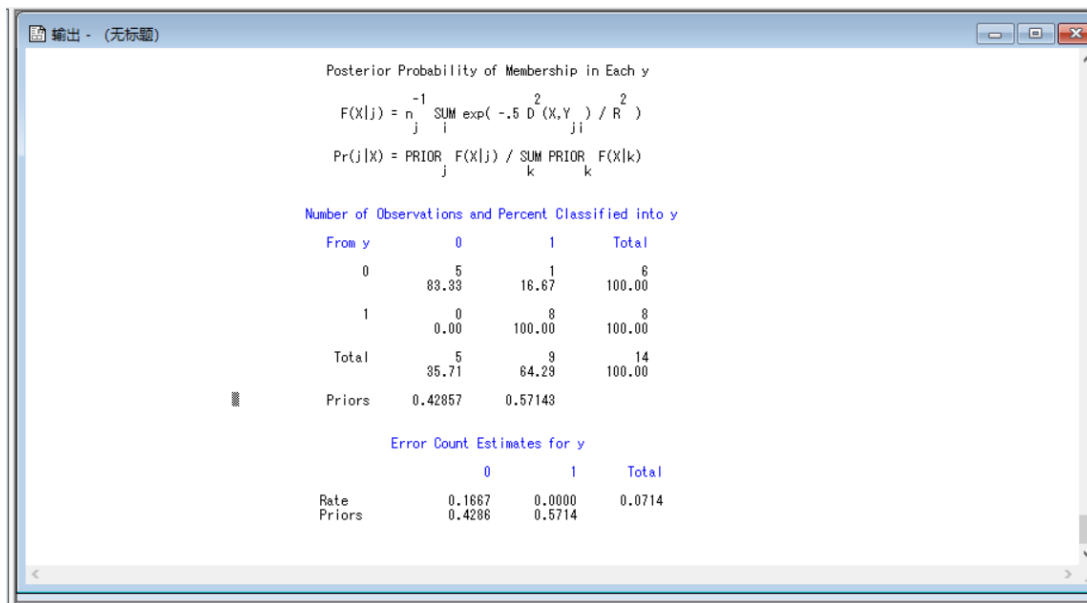

Parametric model results:

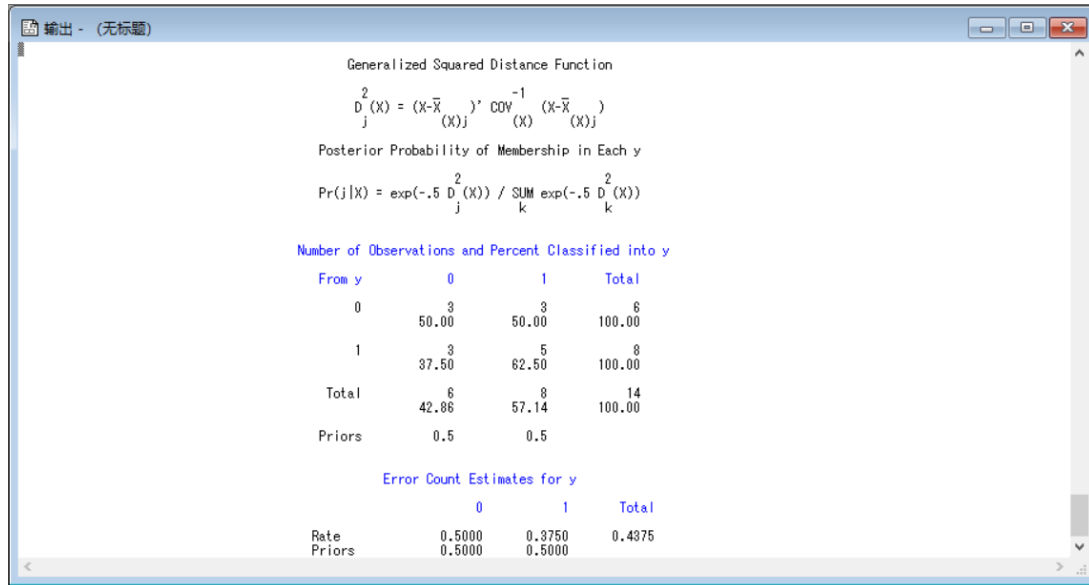

Logistic regression model results:

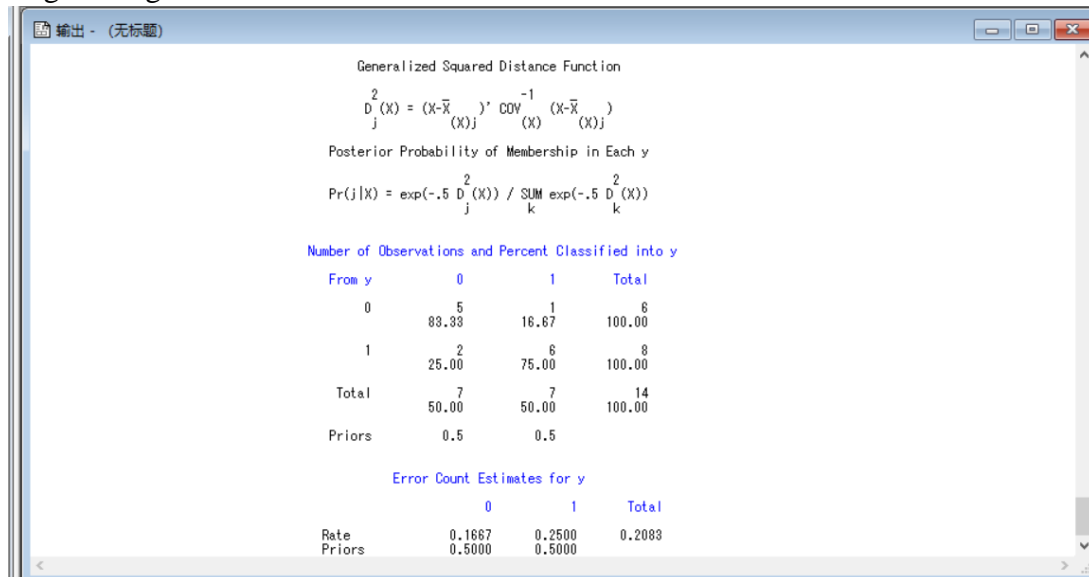

The results of the third simple cross-validation are as follows:

Nonparametric model results:

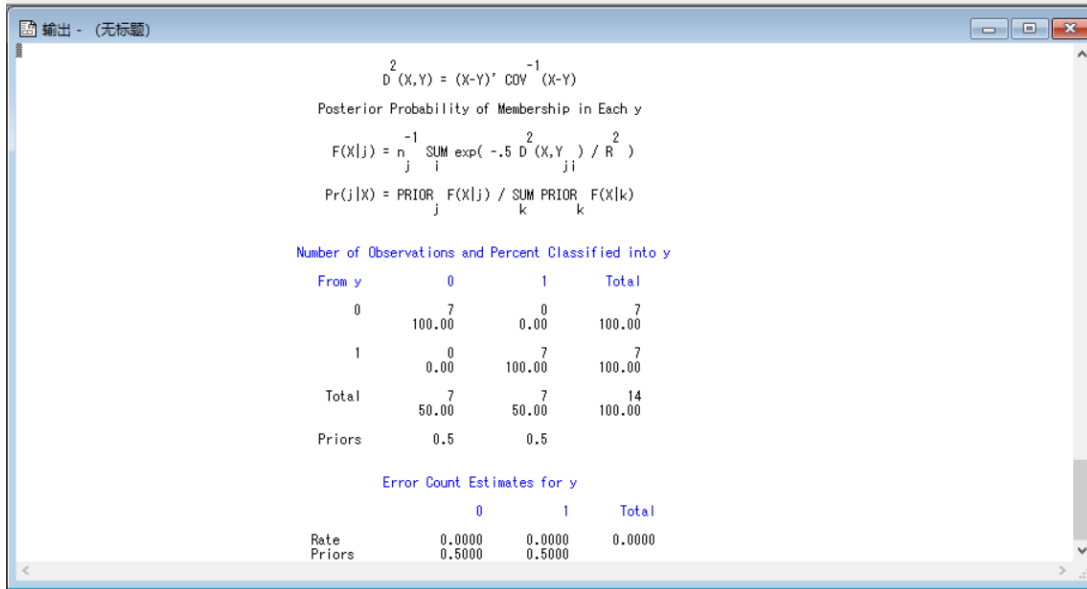

Parametric model results:

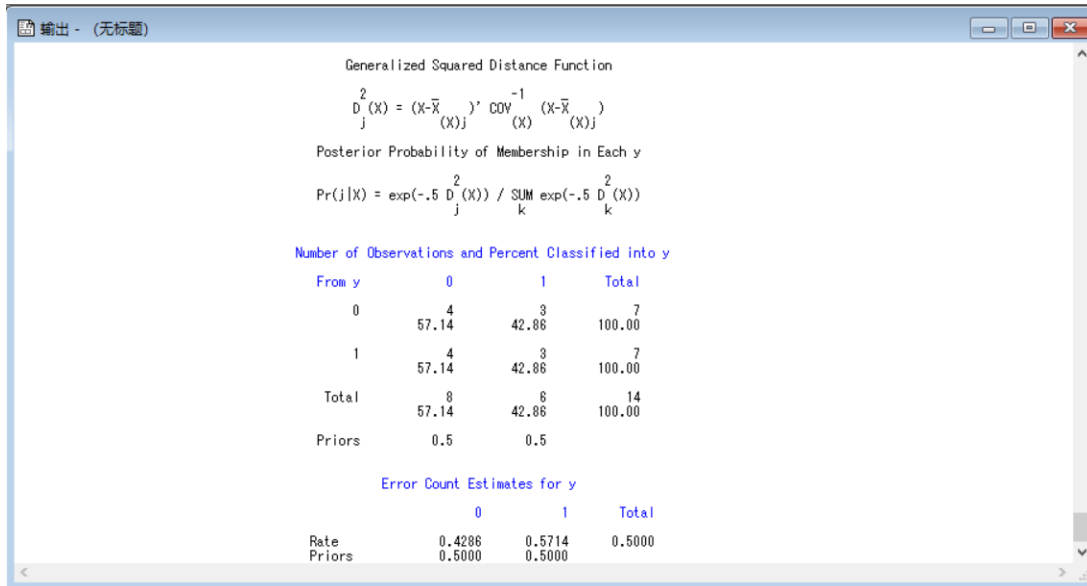

Logistic regression model results:

输出 - (无标题)

Generalized Squared Distance Function

$$D_j^2(X) = (X - \bar{X}_j)' \text{COV}^{-1}(X) (X - \bar{X}_j)$$

Posterior Probability of Membership in Each y

$$\text{Pr}(j|X) = \frac{\exp(-.5 D_j^2(X))}{\sum_k \exp(-.5 D_k^2(X))}$$

Number of Observations and Percent Classified into y

| From y | 0          | 1          | Total        |
|--------|------------|------------|--------------|
| 0      | 5<br>71.43 | 2<br>28.57 | 7<br>100.00  |
| 1      | 1<br>14.29 | 6<br>85.71 | 7<br>100.00  |
| Total  | 6<br>42.86 | 8<br>57.14 | 14<br>100.00 |
| Priors | 0.5        | 0.5        |              |

Error Count Estimates for y

|        | 0      | 1      | Total  |
|--------|--------|--------|--------|
| Rate   | 0.2857 | 0.1429 | 0.2143 |
| Priors | 0.5000 | 0.5000 |        |
